# Supplementary material
Source: publisher site journal article supplement (https://www.dovepress.com/article/282249)
Supplement: Supplementary file 1 [file get_supplementary_file.php]

**Supplementary Figure S1** Decrease in DAS28-ESR in MTX+HCQ and MTX+LEF after propensity score matching over 24 months.


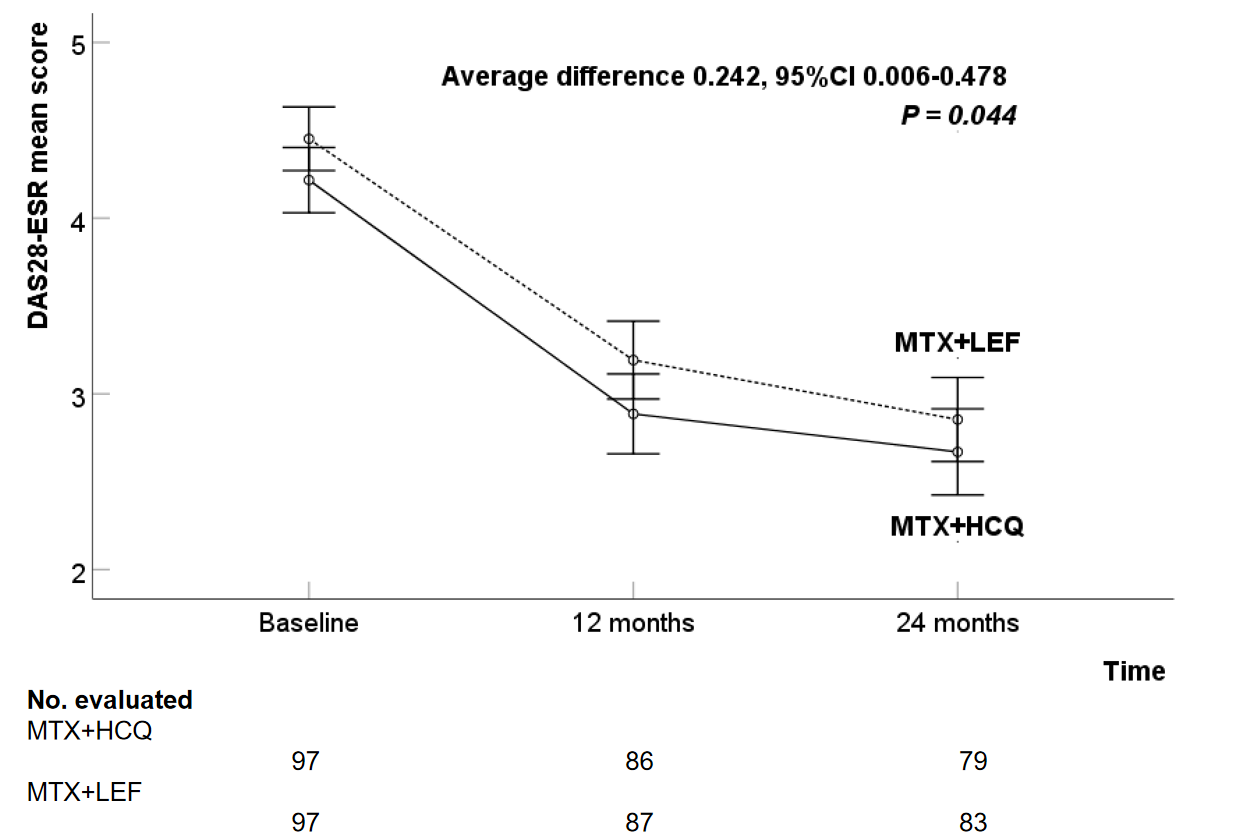


The solid line represents MTX+HCQ, and dashed line represents MTX+LEF. MTX+HCQ therapy was superior to MTX+LEF therapy (F=4.103, P=0.044).

DAS28-ESR, disease activity score in 28 joints using erythrocyte sedimentation rate; MTX, methotrexate; HCQ, hydroxychloroquine; LEF, leflunomide

**Supplementary Figure S2** Cost-effectiveness acceptability curves of 2 strategies.


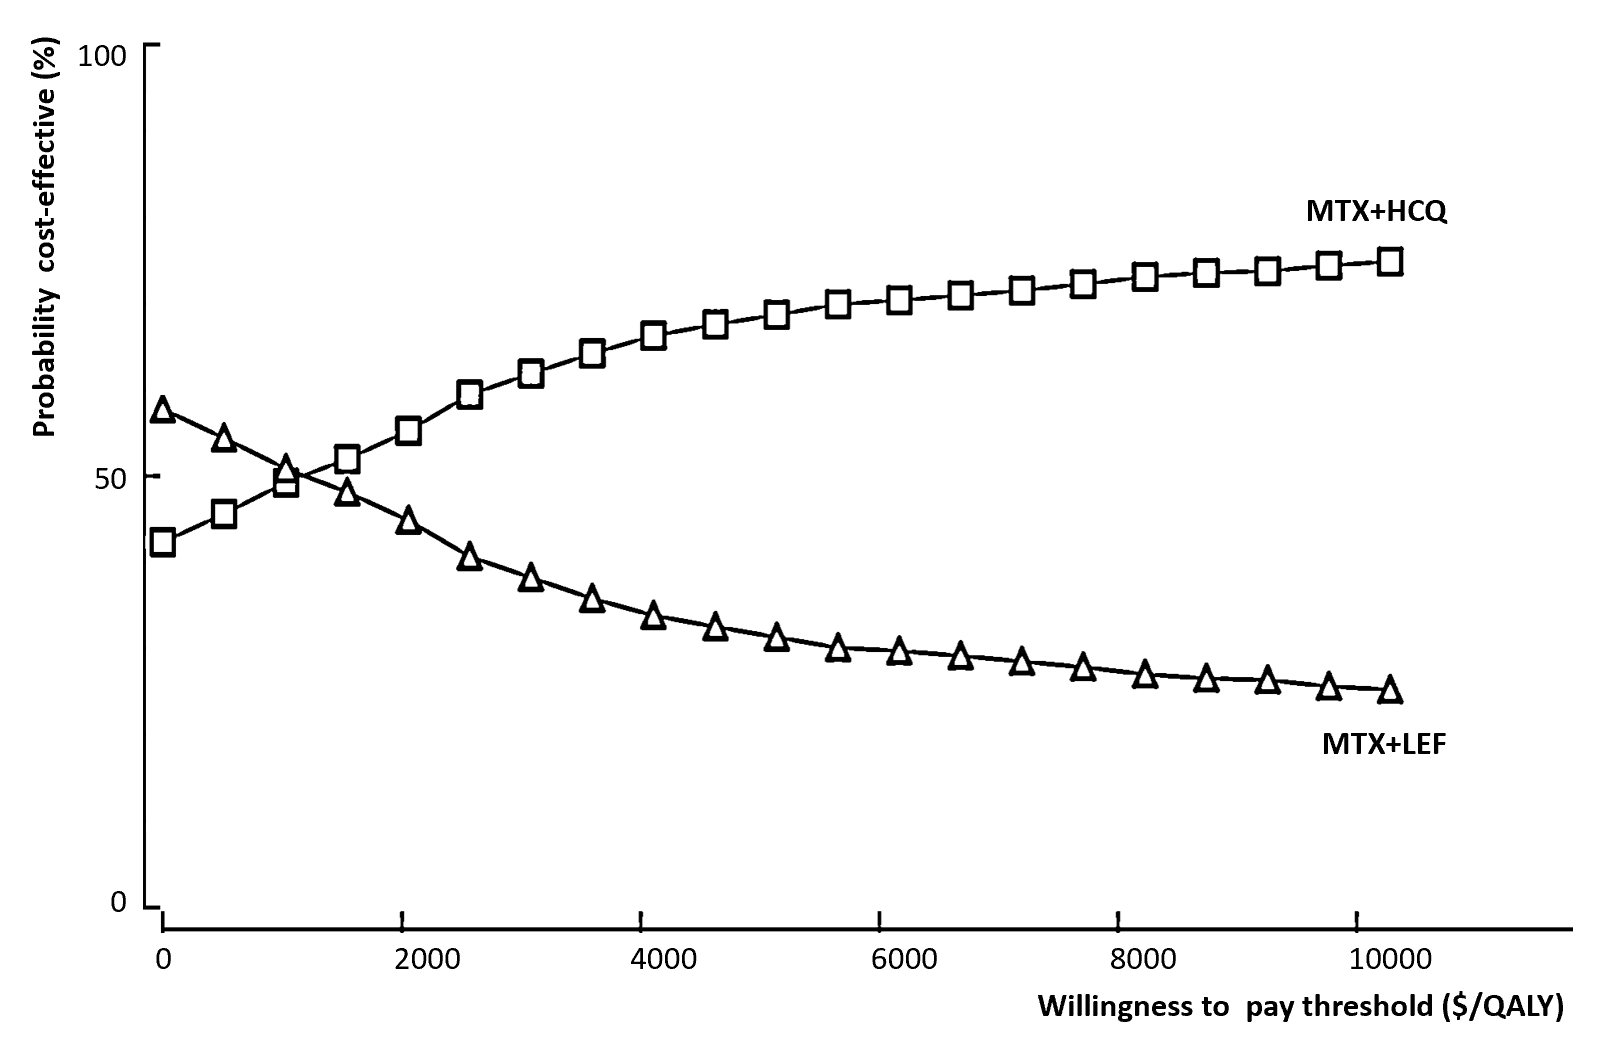


The small squares connected by the line represents the MTX+HCQ group, and the small triangles connected by the line represents the MTX+LEF group.

MTX, methotrexate; HCQ, hydroxychloroquine; LEF, leflunomide
